# Supplementary material
Source: PubMed Central journal article supplement (PMC4779434)
Supplement: NIHMS742800-supplement-1.pdf [file NIHMS742800-supplement-1.pdf]

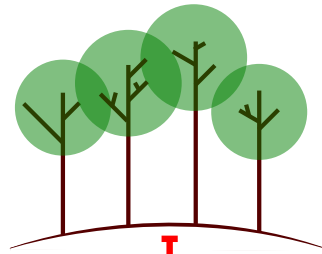

Niche restriction

321 UAG→UAA

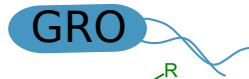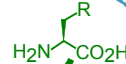

H N V X I T A  
CAC AAU GUA UAG AUC ACG GCA

Expanded genetic code

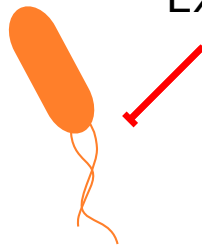

Biocontainment

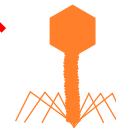

Virus resistance
